# Supplementary figures and images for: Covered stent grafts for relining of chronically occluded femoro‐popliteal bypasses in frail patients
Source: PubMed Central journal article supplement — Clin Case Rep. 2021 Aug 16;9(8):e04647. doi: 10.1002/ccr3.4647 (PMC8365545; doi:10.1002/ccr3.4647), 2021-08-16

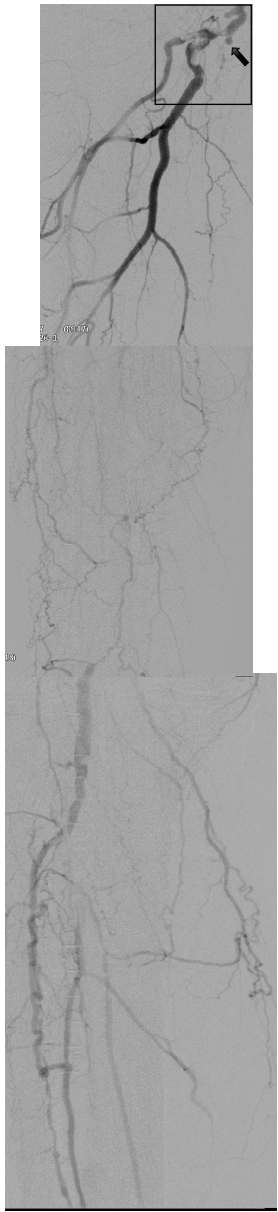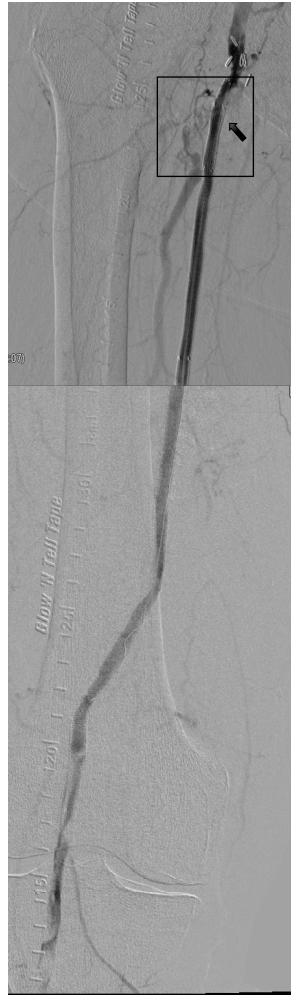

Supplement: CCR3-9-e04647-s001.pdf [file CCR3-9-e04647-s001.pdf]

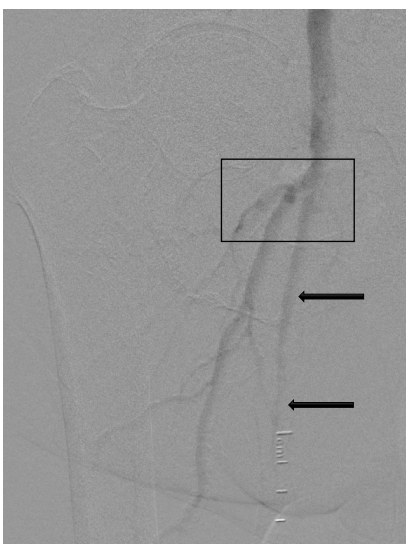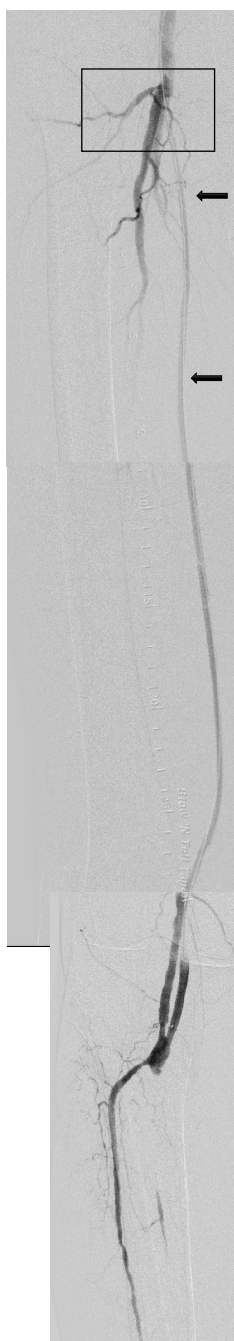

Supplement: CCR3-9-e04647-s002.pdf [file CCR3-9-e04647-s002.pdf]
